# Supplementary material for: Phytophthora infestans RXLR effector SFI5 requires association with calmodulin for PTI/MTI suppressing activity
Source: PubMed Central journal article supplement (PMC6099356; doi:10.1111/nph.15250), 2018-06-22
Supplement: NPH-219-1433-s001.pdf [file NPH-219-1433-s001.pdf]

## ***New Phytologist* Supporting Information**

Article title: *Phytophthora infestans* RXLR effector SF15 requires association with Calmodulin for PTI/MTI suppressing activity

Authors: Xiangzi Zheng, Nadine Wagener, Hazel McLellan, Petra C Boevink, Chenlei Hua, Paul R.J. Birch, Frédéric Brunner

Article acceptance date: 03 May 2018

The following Supporting Information is available for this article:

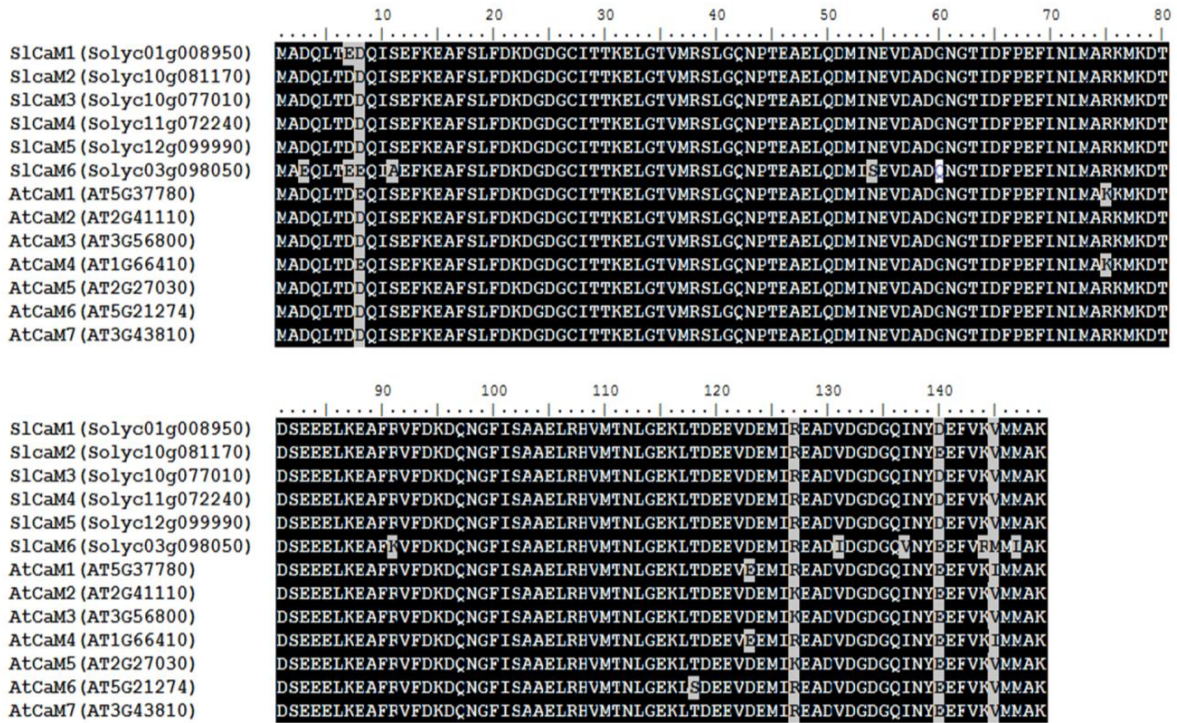

**Fig. S1** Alignment of Tomato and Arabidopsis CaMs. The full-length protein sequences of CaMs were aligned by ClustalW. The accession numbers for these CaMs are indicated in the brackets.

(a)

| Peptide No. | Sequence                              | pI     | Net charge |
|-------------|---------------------------------------|--------|------------|
| 1           | S T W K I F K I I S R L K K L K L K R | 12.137 | 7.903      |
| 2           | S T W K I F K I I S R L K K L K L     | 11.434 | 5.904      |
| 6           | S T W K I F E I I S R L E E L K L K R | 9.706  | 1.914      |
| 10          | S T A K I A K I I S R L K K L K L     | 11.434 | 5.907      |
| 11          | S T A K I A K I I S R L E E L K L K R | 10.453 | 3.910      |
| 12          | S T H K I H K I I S R L K K L K L K R | 12.140 | 8.240      |
| 13          | S T E K I E K I I S R L K K L K L K R | 10.660 | 5.910      |
| 14          | S T E K I E K I I S R L E E L K L K R | 9.540  | 1.920      |

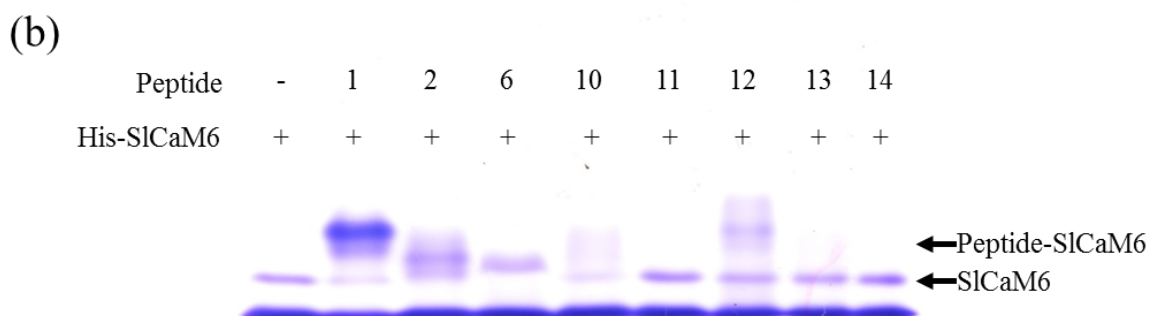

**Fig. S2** In vitro interaction between C-terminal 17-aa domain of SFI5 and His-SlCaM6  
 (a) Synthetic peptides corresponding to the predicted CaM-binding site with various amino acid mutations. Peptide 1 represents the last 19aa at the C-terminus of SFI5. Peptides 2, 6, 10-14 are truncated or mutated versions of peptide 1, in which the substituted amino acids are presented in red. The pI and net charge (at pH7.0) of each peptide were calculated by Editseq (Lasergene v.8; DNASTAR). (b) CaM mobility shift on tris/glycine native gels. Purified His-SlCaM6 (50  $\mu$ M) was incubated with each synthetic peptide (133  $\mu$ M) in the presence of 5 mM  $\text{CaCl}_2$ . Samples were separated on tris/glycine native gels followed by Coomassie blue staining. Arrows indicates the position of bands representing free His-SlCaM6 and peptide-His-SlCaM6 complex.

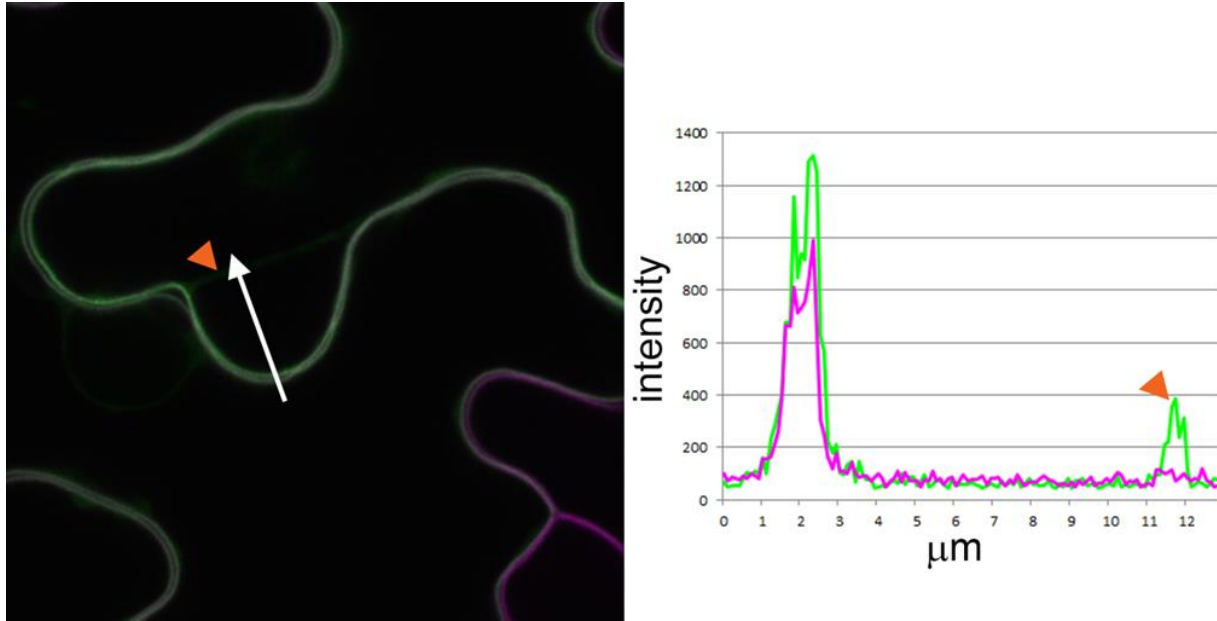

**Fig. S3** The mutation KR/EE does not abolish GFP-SFI5 ED plasma membrane localization in *N. benthamiana* leaves. An example single optical section image of the GFP-SFI5 ED KR/EE mutant (green) co-expressed with the PM marker mOrange-LTi6b (magenta). The arrow indicates the line drawn to generate the intensity profile shown to the right of the image. The profile was drawn such that a cytoplasmic strand (indicated by the orange arrowhead in the image and profile) and the plasma membrane were crossed. The length of the profile is shown in the graph in mm and the intensities are as generated by the confocal software.

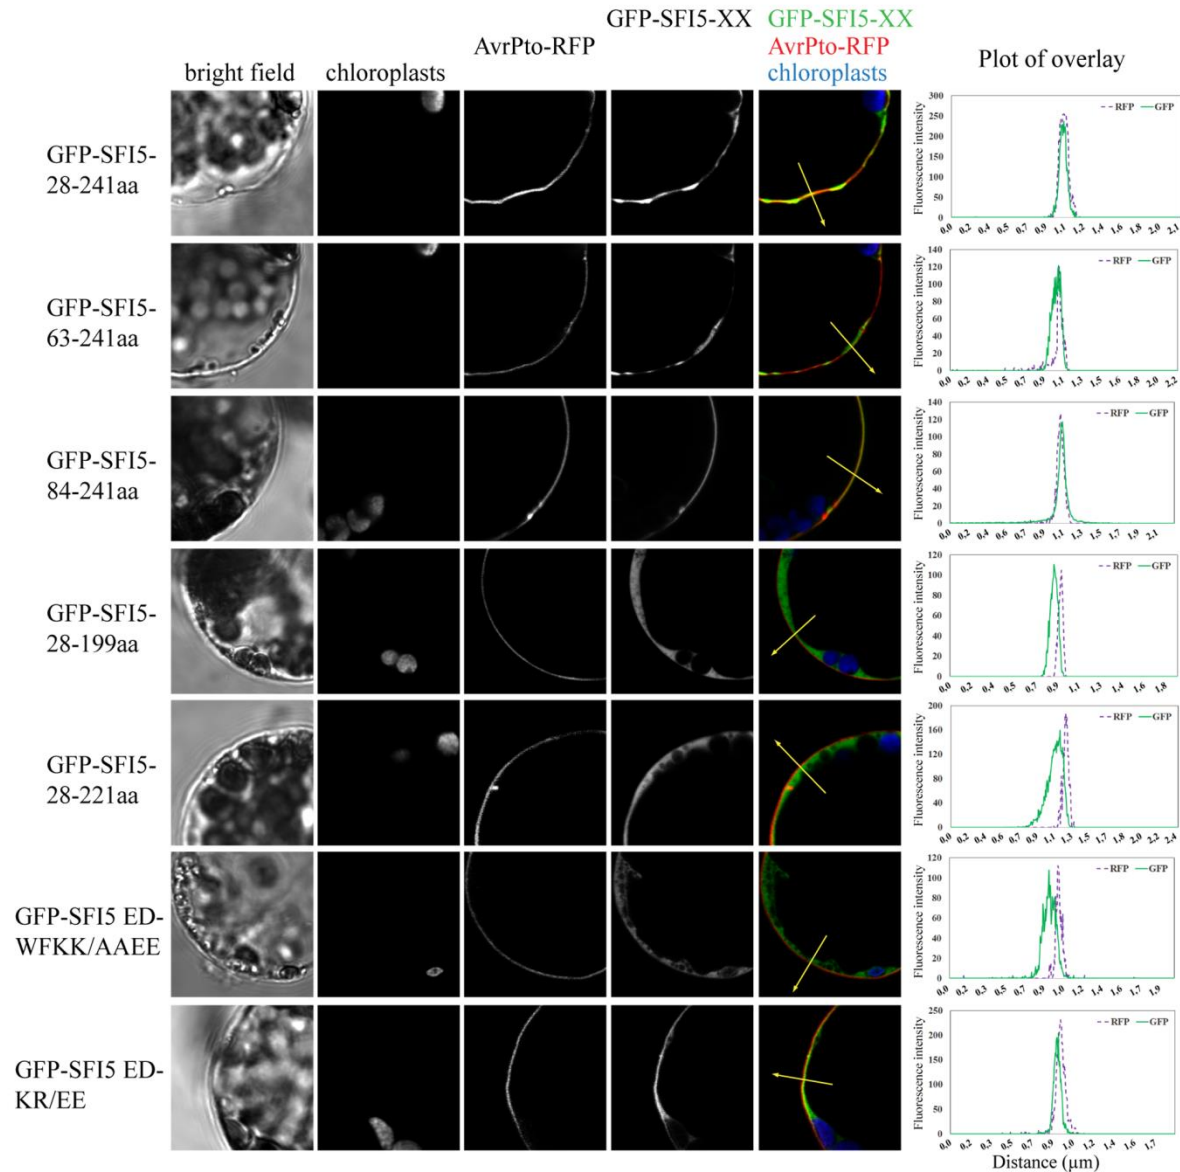

**Fig. S4** The CaM binding motif of SF15 is required for plasma membrane localization in tomato protoplasts. Tomato protoplasts co-expressing N-terminally GFP-tagged SF15 deletion or point mutants (as indicated to the left of each image row) and C-terminally RFP-tagged AvrPto were imaged using confocal microscopy. Images were taken 12 hours after transfection and each line of images shows optical sections of bright field, chloroplast, RFP, GFP and merged fluorescence as indicated. ImageJ software was used to analyze the signal intensity of GFP and RFP fluorescence in the overlay picture along the lines indicated by the yellow arrows (each 0.1  $\mu\text{m}$  in length). Imaging was performed using Leica TCS SP8 AOBS confocal microscopes with HC PL APO 63 $\times$ 1.20W water immersion objectives. Samples were excited and emitted by an argon/krypton mixed gas laser. The following settings were used for: GFP, 488nm/496-520nm; mRFP, 561nm/575-605nm and chloroplasts, 633nm/647-685nm. The pinhole was adjusted to 1.0 airy unit for each wavelength.

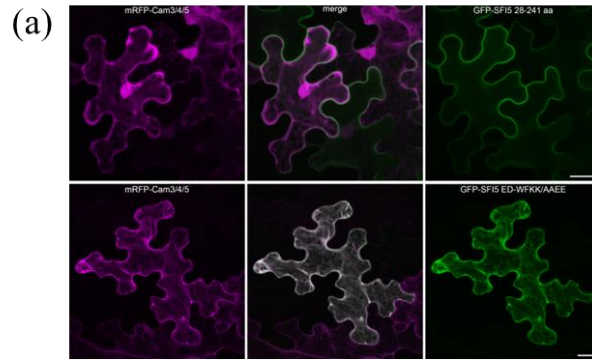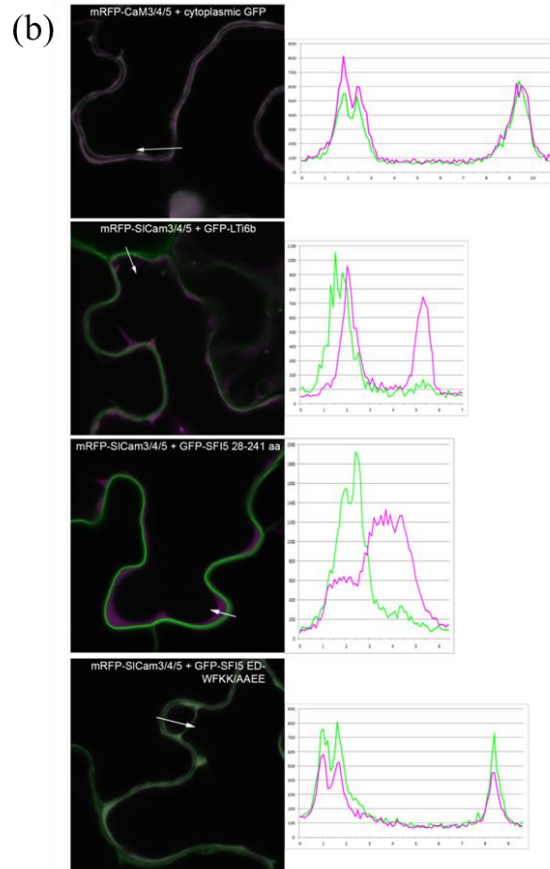

**Fig. S5** mRFP-SiCaM3/4/5 and GFP-SFI5 do not co-localize in *N. benthamiana* leaves. (a) Confocal projection images of cells of *N. benthamiana* leaves co-expressing mRFP-SiCaM3/4/5 (magenta) and GFP-SFI5 28-241 aa or GFP-SFI5 ED WFKK/AEE (in green; as indicated). GFP-SFI5 28-241 aa displays a typical plasma membrane localisation pattern. mRFP-SiCaM3/4/5 and GFP-SFI5 ED WFKK/AEE display typical cytoplasmic labelling. Scale bars represent 20 mm. (b) Single optical section images of mRFP-SiCaM3/4/5 co-expressed with cytoplasmic GFP, the PM marker GFP-LTi6b, GFP-SFI5 28-241 aa or GFP-SFI5 ED WFKK/AEE (as indicated). The arrows indicate the lines drawn to generate the intensity profiles shown to the right of each image. Each profile was drawn such that a cytoplasmic strand, or region of cytoplasm, and the plasma membrane were crossed. The lengths of the profiles are shown in the graphs in mm and the intensities are as generated by the confocal software.

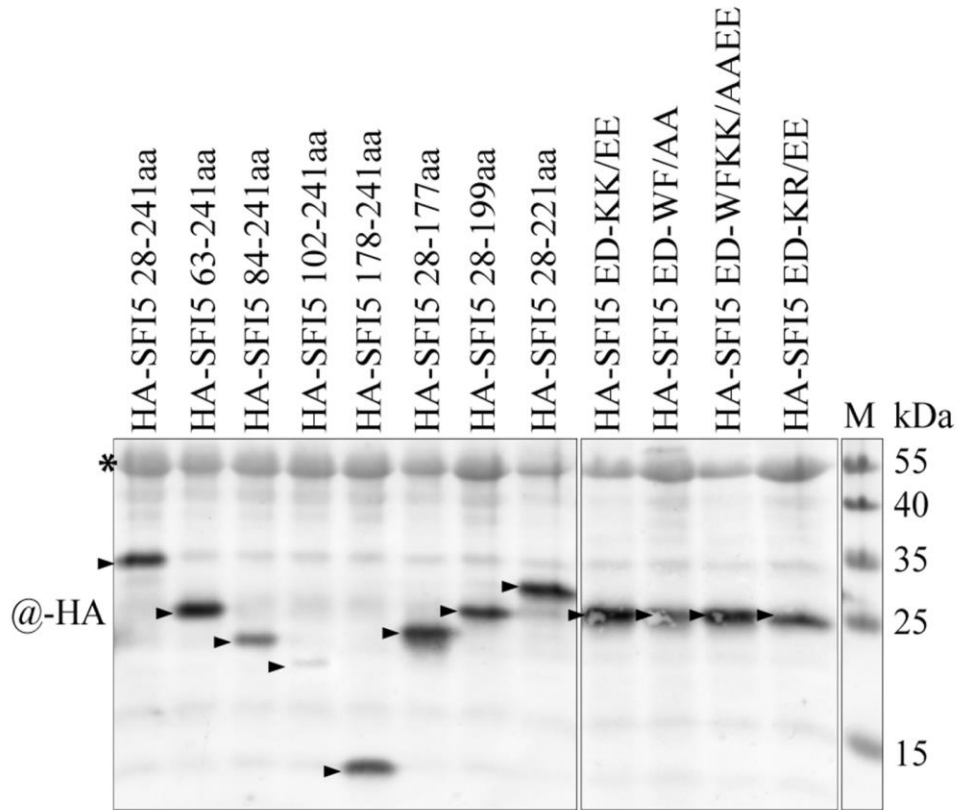

**Fig. S6** Expression of HA-tagged SFI5 deletion and site-directed mutants in tomato protoplasts. Immunodetection of HA-SFI deletion and point mutants transiently expressed in tomato protoplasts for 24 h was performed with anti-HA antibody. Signals corresponding to the different HA fusion proteins are pointed out with an arrow. The asterisk indicates the position of the non-specific Rubisco protein, serving as a loading control. The experiment is representative of three repeats.

**Table S1** List of used primers

| Primers used for the cloning of SICaMs                                                                                      | 5'-3' sequence                                  |
|-----------------------------------------------------------------------------------------------------------------------------|-------------------------------------------------|
| SICaM1-attB1                                                                                                                | AAAAAGCAGGCTTCATGGCGGATCAGCTCACCGAA             |
| SICaM1-attB2                                                                                                                | AGAAAGCTGGGTCTCACTTAGCCATCATAACCTTGAC           |
| SICaM3/4/5-attB1                                                                                                            | AAAAAGCAGGCTTCATGGCGGATCAGCTTACAGATG            |
| SICaM3/4/5-attB2                                                                                                            | AGAAAGCTGGGTCTCACTTAGCCATCATGAC                 |
| SICaM6-attB1                                                                                                                | AAAAAGCAGGCTTCATGGCAGAGCAGCTGAC                 |
| SICaM6-attB2                                                                                                                | AGAAAGCTGGGTCTCACTTGGCAAGCATCAT                 |
| attB1-adapter                                                                                                               | GGGGACAAGTTTGTACAAAAAAGCAGGCT                   |
| attB2-adapter                                                                                                               | GGGGACCACTTTGTACAAGAAAGCTGGGT                   |
| Primers used for generating the SFI5 deletion constructs and site-directed mutagenesis (mutated nucleotides are underlined) |                                                 |
| SFI5 28aa-attB1                                                                                                             | AAAAAGCAGGCTTCACCATGGCCTCCGACCAGAAT             |
| SFI5 63aa-attB1                                                                                                             | AAAAAGCAGGCTTCACCATGTTCTGACAGAACCCCC            |
| SFI5 84aa-attB1                                                                                                             | AAAAAGCAGGCTTCACCATGAACAGCGGGCTACCAGAT          |
| SFI5 102aa-attB1                                                                                                            | AAAAAGCAGGCTTCACCATGAACAGCGGGCTACCAGAT          |
| SFI5 178aa-attB1                                                                                                            | AAAAAGCAGGCTTCACCATGGATCCTTTAAATAGGGAGCAG       |
| SFI5 177aa-attB2                                                                                                            | AGAAAGCTGGGTCTTAAAGCTTGACAATGGCCGA              |
| SFI5 199aa-attB2                                                                                                            | AGAAAGCTGGGTCTTAAAGCTGATTCTTTTAAGAGCAA          |
| SFI5 221aa-attB2                                                                                                            | AGAAAGCTGGGTCTTATTTGGACTTGGCTGCCATA             |
| SFI5 241aa-attB2                                                                                                            | AGAAAGCTGGGTCTCAACGTTTTAGCTTTAATTTTT            |
| SFI5 ED-WF/AA-1                                                                                                             | AGCACGGCTAAAATCGCTAAAATTATCTCGA                 |
| SFI5 ED-WF/AA-2                                                                                                             | TTAGCGATTTTAGCCGTGCTTGGTTTGGGA                  |
| SFI5 ED-KK/EE-1                                                                                                             | GGCTTGAGGAGTTAAAGCTAAAACGTTAACACCC              |
| SFI5 ED-KK/EE-2                                                                                                             | TTA <u>ACTCCT</u> CAAGCCTCGAGATAATTTTAAAGATTTTC |
| SFI5 ED-KR/EE-1                                                                                                             | GCTAGAGGAGTAACACCCAGCTTTCTTGAC                  |
| SFI5 ED-KR/EE-2                                                                                                             | TGTTACTCCTCTAGCTTTAATTTTTTAAGCCTCG              |
| XmnI-SFI5-F                                                                                                                 | CCGGAAGGATTCATGGCCTCCGACCAGAAT                  |
| SaII-SFI5-R                                                                                                                 | ACGCGTCGACTCAACGTTTTAGCTTTAATTTTT               |
| SaII-SFI5-R                                                                                                                 | ACGCGTCGACTCAACGTTTTAGCTTTAATTTTT               |



**Table S2** Potential SFI5-interacting proteins identified by LC-MS/MS analysis. Total protein extracts from tomato protoplasts expressing HA-SFI5 were immunoprecipitated with anti-HA affinity matrix and the eluted proteins were subject to liquid chromatography followed by LC-MS/MS. Protoplasts expressing the empty vector or HA-SFI1 (Zheng et al., 2014) served as control for interactor specificity. The table is listing putative protein interacting candidates that were identified only in the presence of HA-SFI5.

| Protein ID    | Protein Descriptions                                                                                                              | Experiment (HA-SFI5) |              |
|---------------|-----------------------------------------------------------------------------------------------------------------------------------|----------------------|--------------|
|               |                                                                                                                                   | Intensity            | # of Peptide |
| Q8RXB8_SOLLC  | N-hydroxycinnamoyl-CoA:tyramine N-hydroxycinnamoyl transferase THT1-3; [Solanum lycopersicum (Tomato) (Lycopersicon esculentum).] | 4588200              | 1            |
| IPI00938824.1 | CAM1 (CALMODULIN 1); calcium ion binding;Calmodulin-1/4                                                                           | 2128200              | 3            |
| IPI00548063.1 | 60S ribosomal protein L5-1;60S ribosomal protein L5-2                                                                             | 1567500              | 1            |
| IPI00543640.1 | 50S ribosomal protein L17, chloroplastic                                                                                          | 1428200              | 1            |
| IPI00548475.1 | 60S ribosomal protein L18a-2                                                                                                      | 1195800              | 2            |
| IPI00536958.1 | Calmodulin-7;Calmodulin-2/3/5;Calmodulin-6;CAM5 (CALMODULIN 5)                                                                    | 959950               | 3            |
| IPI00657454.1 | EIF4A1 (EUKARYOTIC TRANSLATION INITIATION FACTOR 4A1); ATP-dependent helicase/ translation initiation                             | 572990               | 2            |
| RR8_SOLLC     | 30S ribosomal protein S8, chloroplastic; [Solanum lycopersicum (Tomato) (Lycopersicon esculentum).]                               | 552660               | 3            |
| IPI00526224.1 | 30S ribosomal protein S18, chloroplastic; [Solanum lycopersicum (Tomato) (Lycopersicon esculentum).]                              | 528660               | 3            |
| TL29_SOLLC    | Thylakoid lumenal 29 kDa protein, chloroplastic; [Solanum lycopersicum (Tomato) (Lycopersicon esculentum).]                       | 378590               | 2            |
| IPI00528531.1 | Calmodulin-like protein 8                                                                                                         | 333140               | 1            |
| IPI00529254.2 | 30S ribosomal protein S14, chloroplastic; [Solanum lycopersicum (Tomato) (Lycopersicon esculentum).]                              | 318030               | 1            |
| RR16_SOLLC    | 30S ribosomal protein S16, chloroplastic; [Solanum lycopersicum (Tomato) (Lycopersicon esculentum).]                              | 298370               | 1            |
| IPI00539263.1 | Prx B 2-Cys Prx B (2-Cysteine peroxiredoxin B); antioxidant/ peroxiredoxin                                                        | 221600               | 1            |
| IPI00520130.1 | ATP synthase alpha chain, mitochondrial, putative;ATP synthase subunit alpha, mitochondrial;ATPase subunit 1                      | 209090               | 1            |
| IPI00519748.1 | Glutamine synthetase cytosolic isozyme 1-1                                                                                        | 177900               | 1            |
| O49877_SOLLC  | Cysteine protease TDI-65; [Solanum lycopersicum (Tomato) (Lycopersicon esculentum).]                                              | 152200               | 1            |
| IPI00520128.1 | AtRABA1e (Arabidopsis Rab GTPase homolog A1e);Putative GTP-binding protein                                                        | 140620               | 1            |
| IPI00543126.2 | Chlorophyll a-b binding protein 7, chloroplastic; [Solanum lycopersicum (Tomato) (Lycopersicon esculentum).]                      | 136110               | 1            |
| IPI00539779.3 | Putative vacuolar proton ATPase subunit E; [Solanum lycopersicum (Tomato) (Lycopersicon esculentum).]                             | 132260               | 1            |
| Q9M7M2_SOLLC  | DnaJ-like protein; [Solanum lycopersicum (Tomato) (Lycopersicon esculentum).]                                                     | 102830               | 1            |
| IPI00542662.1 | 26S protease regulatory subunit 8 homolog A;26S protease regulatory subunit 8 homolog B                                           | 63488                | 1            |
| IPI00539067.1 | Probable UDP-glucose 6-dehydrogenase 2                                                                                            | 62907                | 1            |
| Q4W5U8_SOLLC  | FtsH protease; [Solanum lycopersicum (Tomato) (Lycopersicon esculentum).]                                                         | 57105                | 1            |
| Q9LEG3_SOLLC  | Putative alcohol dehydrogenase; [Solanum lycopersicum (Tomato) (Lycopersicon esculentum).]                                        | 50268                | 1            |
| IPI00526133.1 | Proteasome subunit alpha type-5-A                                                                                                 | 47313                | 1            |
| C6K2K9_SOLLC  | GDP-mannose 3',5'-epimerase; EC=5.1.3.18; [Solanum lycopersicum (Tomato) (Lycopersicon esculentum).]                              | 41934                | 2            |
| A7LI54_SOLLC  | Phototropin-2; [Solanum lycopersicum (Tomato) (Lycopersicon esculentum).]                                                         | 31052                | 1            |
| IPI00938787.1 | phosphoglucomutase, cytoplasmic, putative / glucose phosphomutase, putative                                                       | 30334                | 1            |

Zheng X, McLellan H, Fraiture M, Liu X, Boevink PC, Gilroy EM, Chen Y, Kandel K, Sessa G, Birch PR, Brunner F. 2014. Functionally redundant RXLR effectors from *Phytophthora infestans* act at different steps to suppress early flg22-triggered immunity. *PLoS Pathog* 10(4): e1004057.
